# Supplementary material for: “Living a normal life”: a qualitative study of patients’ views of medication withdrawal in rheumatoid arthritis
Source: PubMed Central journal article supplement (PMC6567658; doi:10.1186/s41927-019-0070-y), 2019-06-13

Supplementary Figure S1 – Hierarchical tree of analytic themes relating to advantages and disadvantages of DMARD therapy.

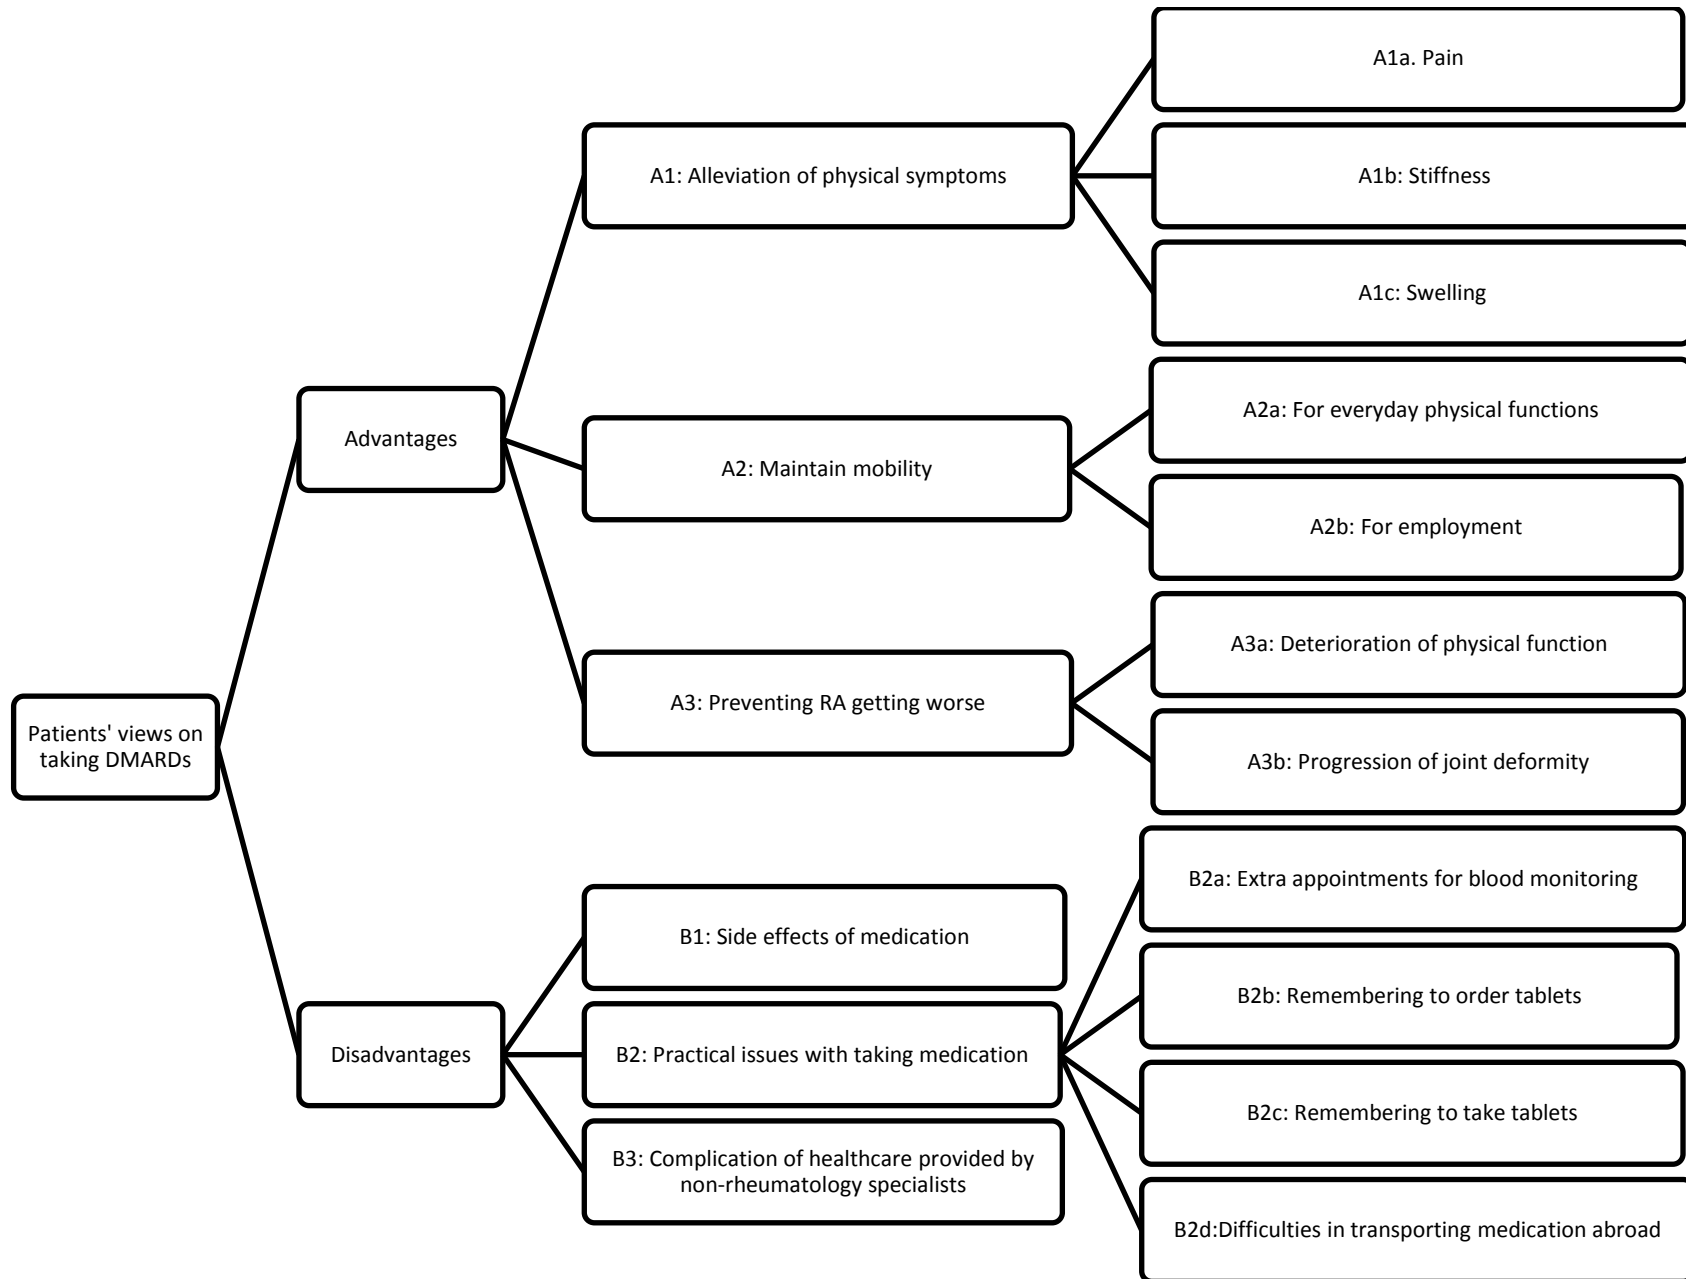

Supplement: 41927_2019_70_MOESM2_ESM.pdf [file 41927_2019_70_MOESM2_ESM.pdf]
